# Supplementary material for: A 3D hanging spheroid-filter plate for high-throughput drug testing and CAR T cell cytotoxicity assay
Source: Royal Society of Chemistry journal article supplement (doi:10.1039/d3an01904g), 2023-11-29
Supplement: d3an01904g1.pdf [file d3an01904g1.pdf]

## Supporting information

### **3D Hanging Spheroid-Filter Plate for High-throughput Drug Testing and CAR T Cell Cytotoxicity Assay**

Zhenzhong Chen,<sup>a</sup> Seokgyu Han,<sup>a</sup> Sein Kim,<sup>b</sup> Chanyang Lee,<sup>a</sup> Arleen Sanny,<sup>c</sup> Andy Hee-Meng Tan,<sup>c</sup> Sungsu Park <sup>\*, a, b, d</sup>

<sup>a</sup> School of Mechanical Engineering, Sungkyunkwan University (SKKU), Suwon, 16419, Korea.

<sup>b</sup> Department of Biomedical Engineering, Sungkyunkwan University (SKKU), Suwon, 16419, Korea.

<sup>c</sup> Bioprocessing Technology Institute (BTI), Agency for Science, Technology and Research (A\*STAR), 20 Biopolis Way, Centros, Singapore 138668, Republic of Singapore.

<sup>d</sup> Department of Biophysics, Institute of Quantum Biophysics (IQB), Sungkyunkwan University (SKKU), Suwon, 16419, Korea.

\*Corresponding author, e-mail: [nanopark@skku.edu](mailto:nanopark@skku.edu)

## Supporting Figures

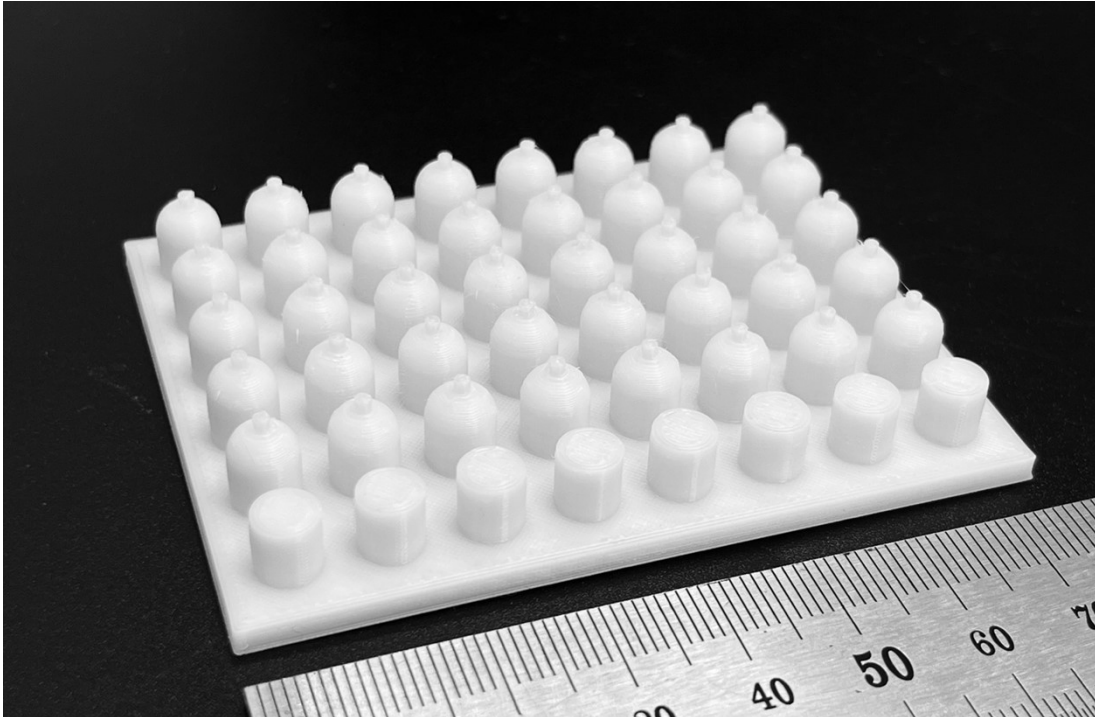

**Figure S1.** Photograph of cell culture array molds fabricated from ABS filament via 3D printer (Single Plus – 320C, Cubicon).

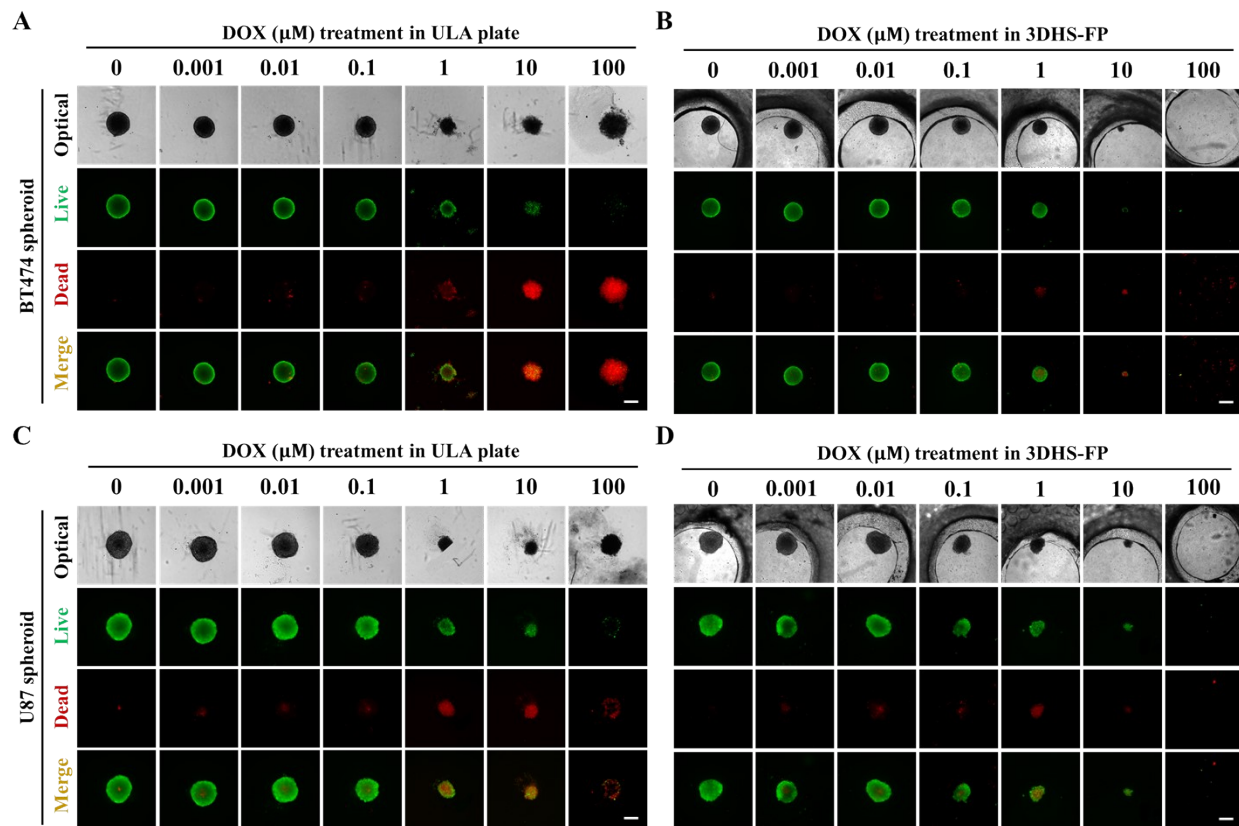

**Figure S2.** BT474 and U87 spheroids were treated with varying concentrations of DOX (0-100  $\mu\text{M}$ ) for a period of 3 days, using either ULA plates or the 3DHS-FP. (A) BT474 spheroids treated with doxorubicin at different concentrations in ULA plates or (B) within the 3DHS-FP. Scale bar: 200  $\mu\text{m}$ . (C) U87 spheroids treated with doxorubicin at different concentrations in ULA plates or (D) within the 3DHS-FP. Scale bar: 200  $\mu\text{m}$ . Optical and fluorescent images of the treated spheroids depict live cells stained with calcein-AM (green) and dead cells stained with ethidium homodimer-1 (red).

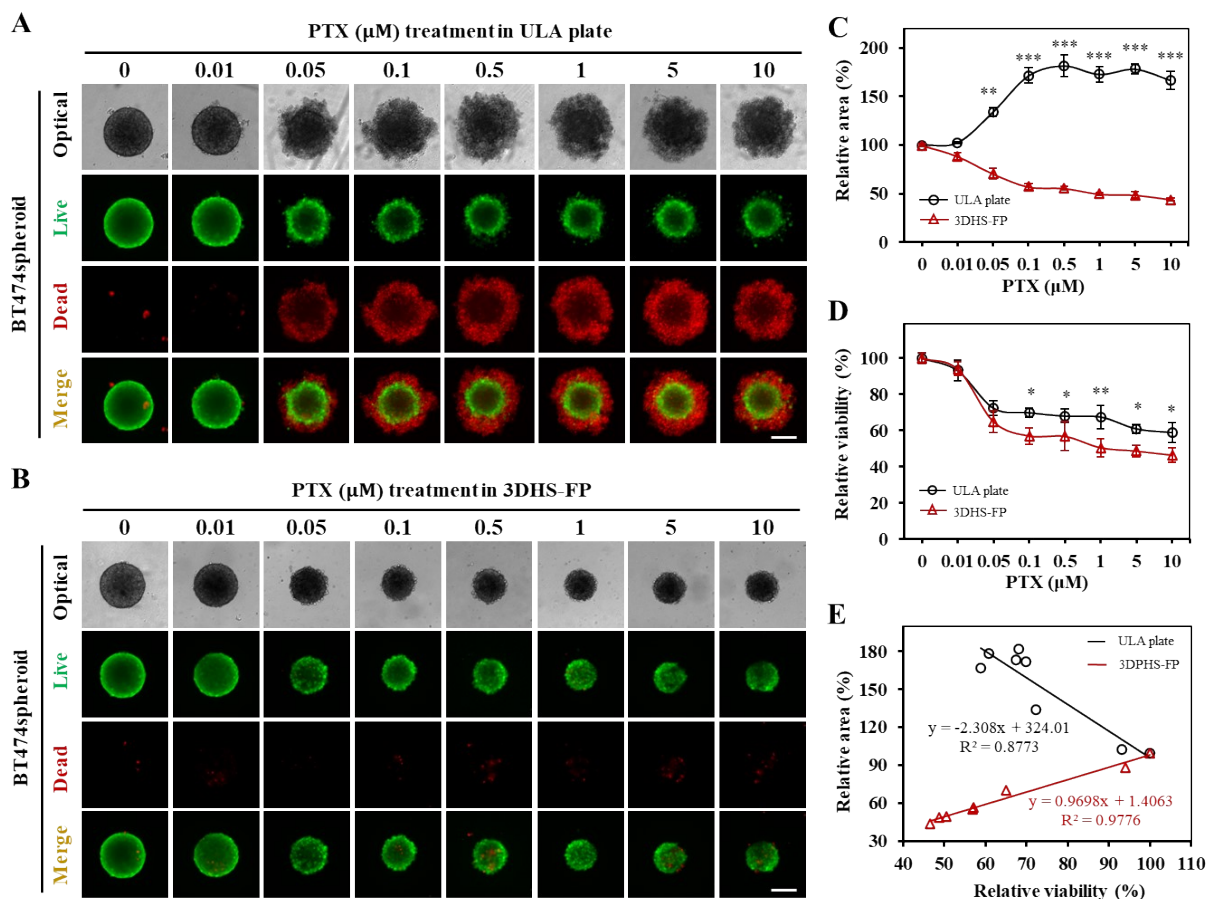

**Figure S3.** BT474 spheroids were subjected to different concentrations of PXT treatment for a duration of 2 days, both on ULA plates and within the 3DHS-FP. (A) Representative optical images and live/dead staining images of BT474 spheroids, both untreated and treated with varying paclitaxel concentrations. Live cells are labeled with calcein-AM (green), while dead cells are marked with ethidium homodimer-1 (red). Scale bar: 200  $\mu\text{m}$ . (B) Relative spheroid area and (C) viability of untreated and treated spheroids on each plate. The data is presented as the mean  $\pm$  standard error of the mean (SEM) ( $n=5$ ). Statistical analysis was performed using Student's  $t$ -test: \* $p < 0.05$ , \*\* $p < 0.01$ , \*\*\* $p < 0.001$ . (D) Linear regression analysis depicting the relationship between spheroid viability and spheroid area. (E) Regression linear analysis between viability and area of spheroid.

## Supporting Movie

**Movie S1.** The process within the 3DHS-FP platform involves separating dead cells and HER2-CAR T cells from the surviving tumor spheroid. Within the 3DHS-FP, upon a spheroid reaching approximately 300  $\mu\text{m}$  in diameter, 10  $\mu\text{L}$  of RPMI-1640 with a specific quantity of HER2-CAR T cells (3,000 cells) was introduced. The video demonstrates how some dead cells drift away from the spheroid located in the separation array (Figure 2G and 2H). This footage lasts for 30 seconds, capturing each frame at one-second intervals.
